# Supplementary material for: Exploring Thrips Preference and Resistance in Flowers, Leaves, and Whole Plants of Ten Capsicum Accessions
Source: MDPI journal article supplement (doi:10.3390/plants12040825), 2023-02-13
Supplement: s1 [file s1]

## Supplementary figures

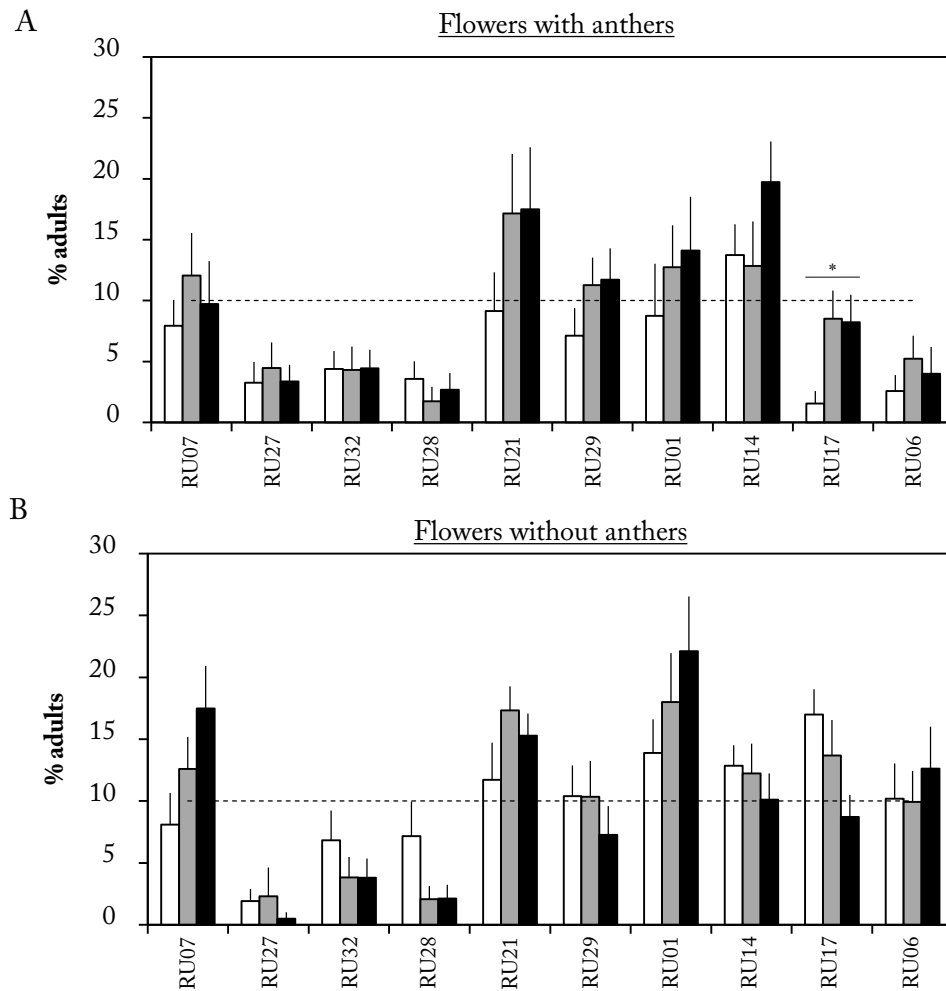

Figure S1. *Frankliniella occidentalis* full choice behavior assay on flowers with and without anthers after 10 minutes (white bars), 1h (grey bars) and 2h (black bars) of 10 *Capsicum* accessions. (A) Mean ( $\pm$ SE) percentage of adult thrips present on flowers with anthers ( $n = 10$  per accession). (B) Mean ( $\pm$ SE) percentage of adult thrips present on flowers without anthers ( $n = 10$  per accession). An asterisk indicates a significant difference within an accession among time points ( $P < 0.05$ , Friedman ANOVA).

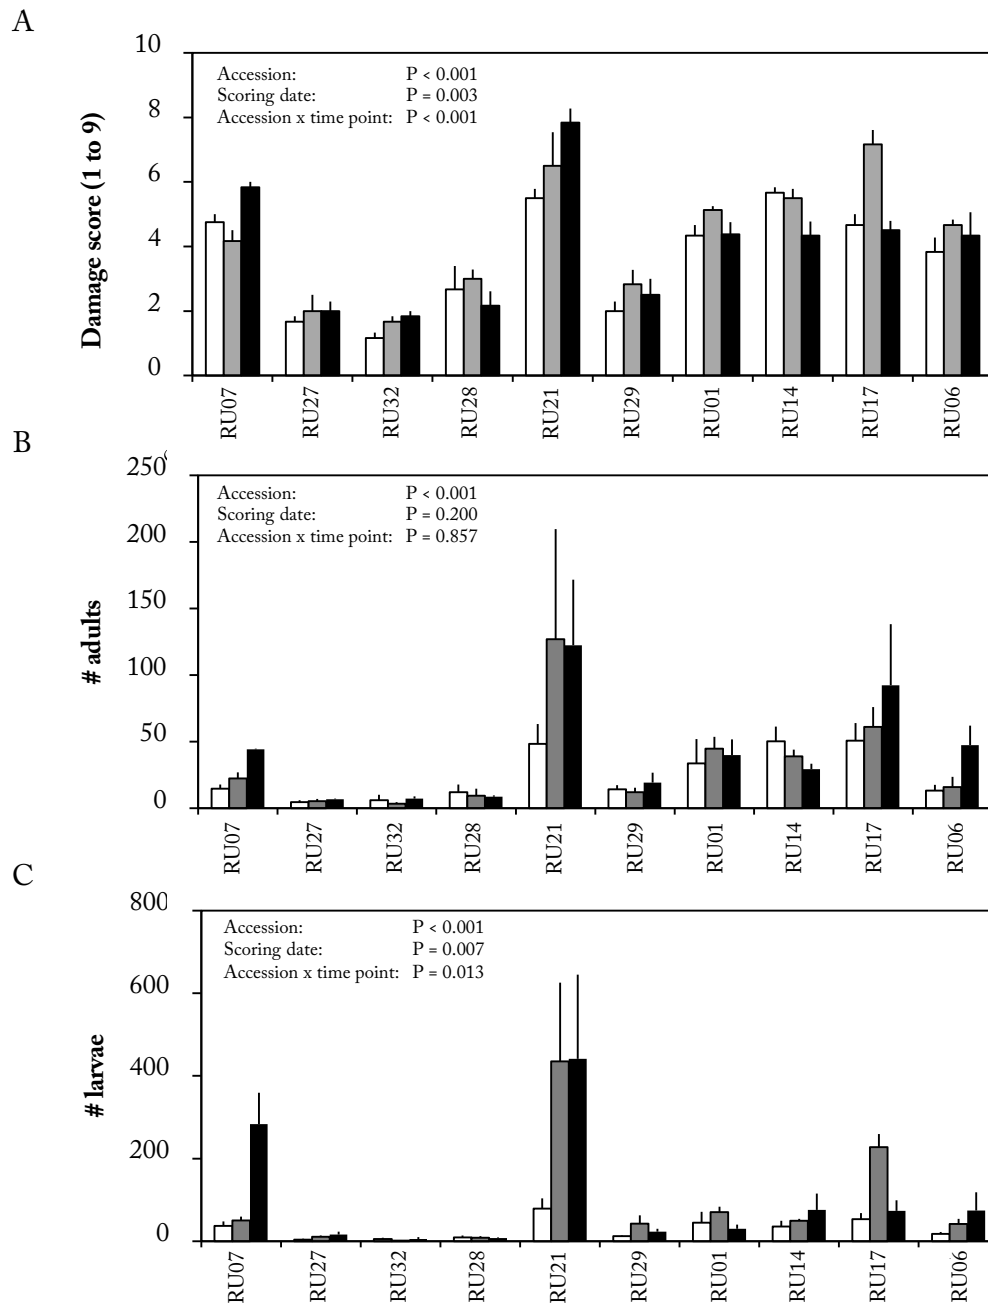

Figure S2. *Frankliniella occidentalis* population development on 10 *Capsicum* accessions 2 (white bars), 3 (grey bars) and 5 weeks (black bars) after inoculation. (A) Mean ( $\pm$ SE) damage scores of whole plant screening (1 little damage, 9 severe damage,  $n = 3-4$  per accession). (B and C) Mean ( $\pm$ SE) number of adults and larvae, respectively ( $n = 3-4$  per accession). P-values of overall main effects of accession and scoring data on thrips parameters (ANOVA for independent data), are given in each graph.
